# Supplementary material
Source: MDPI journal article supplement (https://www.mdpi.com/2076-3417/12/6/2974)
Supplement: s1 [file s1 › applsci-1623741-supplementary.pdf]

**Supplementary material:**

**Impacts of environmental factors on the formation and development of biological soil crusts in lime concrete materials of building facades**

Wenxuan Xiong<sup>1</sup>, Yue Tao<sup>1</sup>, Panpan Wang<sup>1</sup>, Kaiting Wu<sup>2</sup>, Lanzhou Chen<sup>1\*</sup>

1. School of Resource & Environmental Sciences, Hubei Key Laboratory of Biomass Resource Chemistry and Environmental Biotechnology, Hubei Research Center of Environment Remediation Technology, Wuhan University, Wuhan 430079, P.R. China
2. Logistics Support Department, Wuhan University, Wuhan 430079, P.R. China.

**This supplementary material contains 8 pages, 5 Figures and 2Tables.**

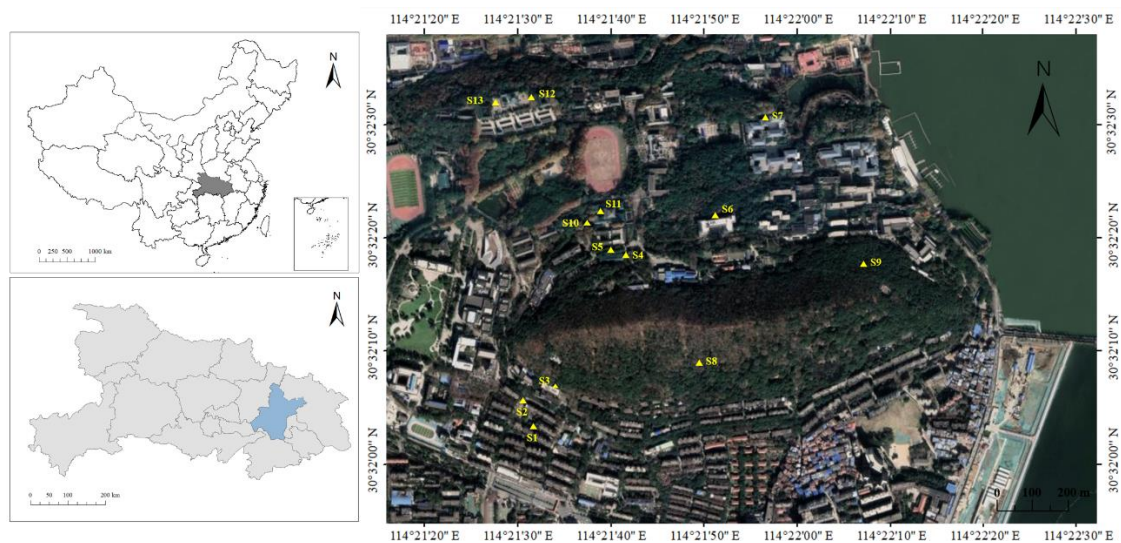

**Figure S1.** Location of sampling sites.

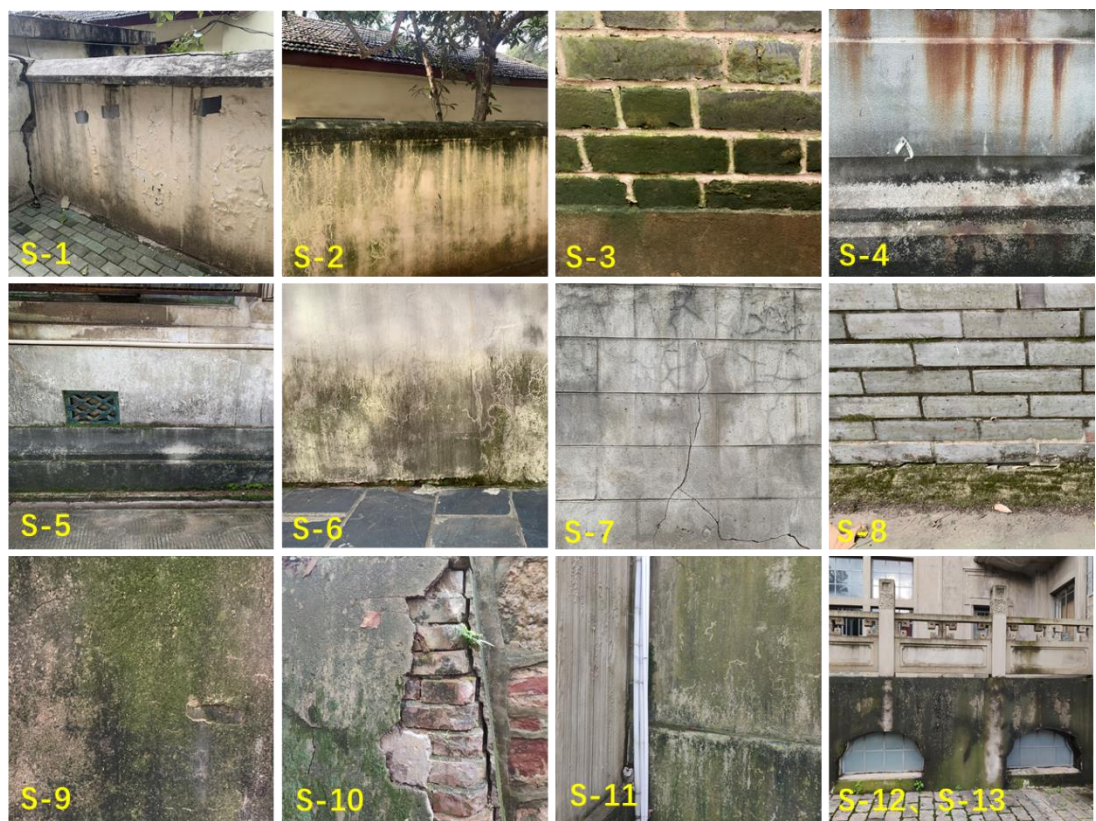

**Figure S2.** Biofilms on the facades of the early architecture of Wuhan University.

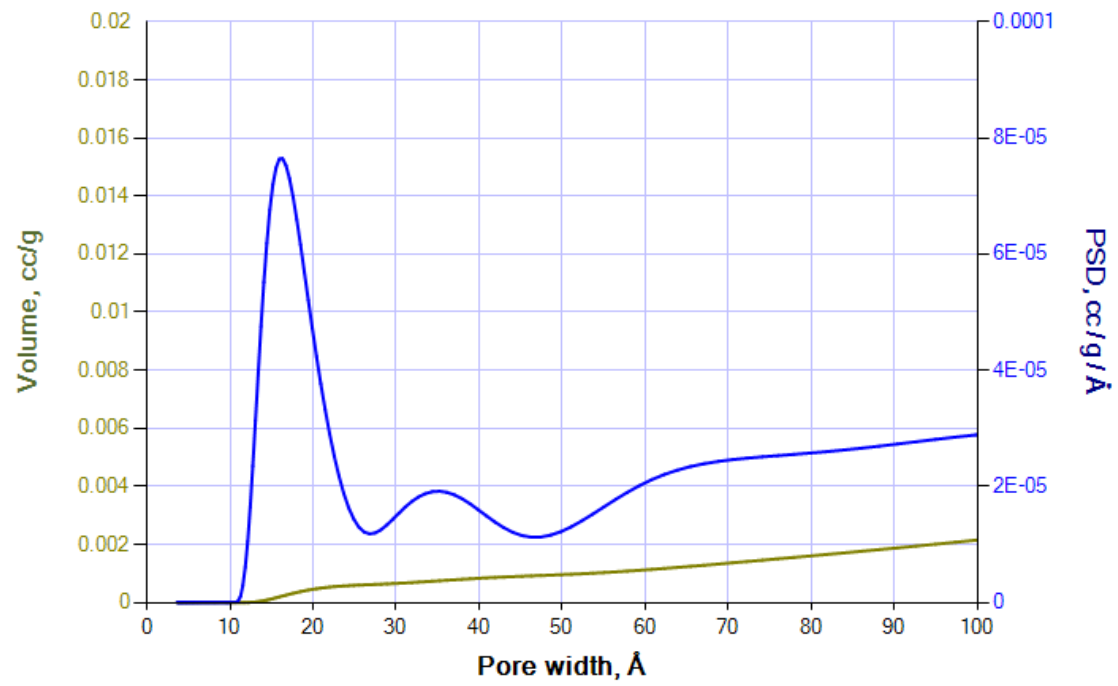

**Figure S3.** Pore volume and pore size distribution of lime concrete.

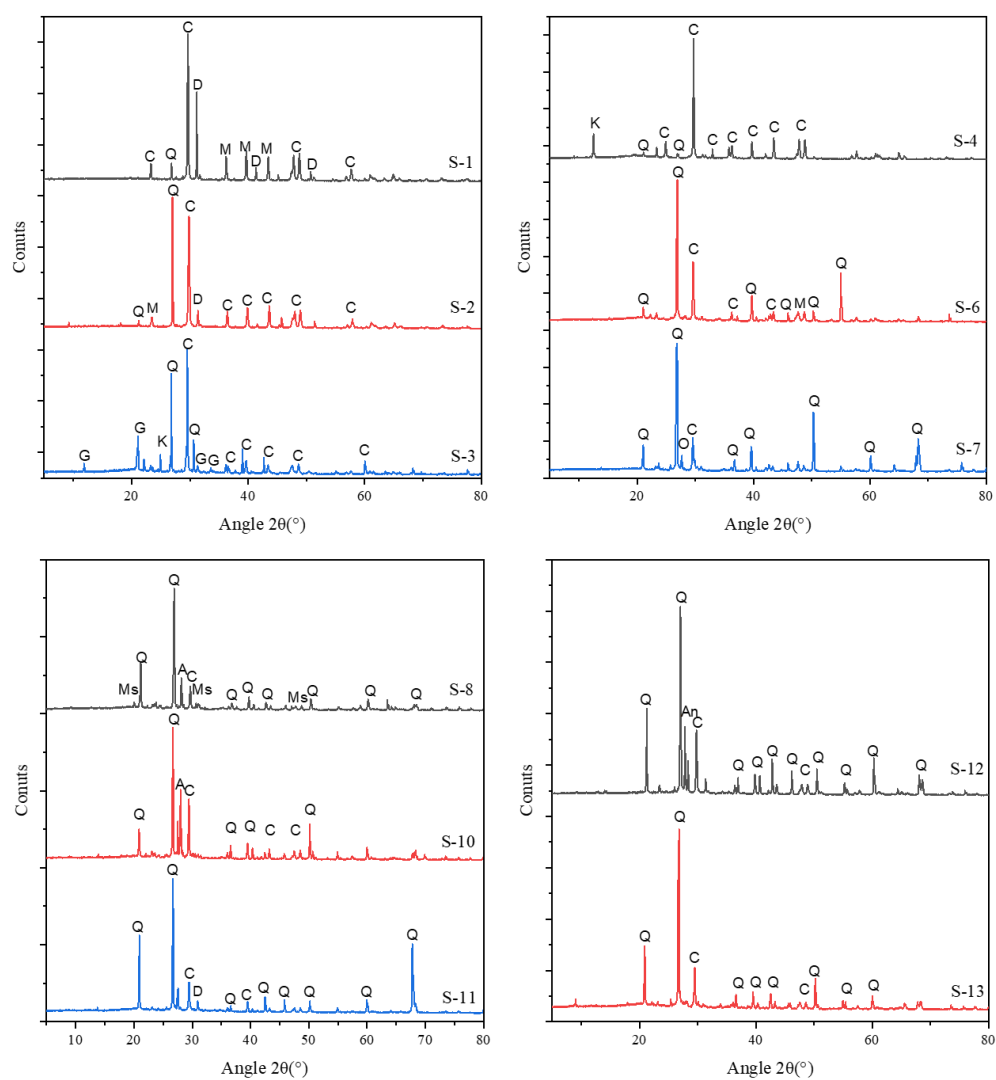

**Figure S4.** XRD diffractograms of the construction materials; Q: quartz; C: calcite; M: calcite, magnesian; A: albite; D: dolomite; K: kaolinite; G: gypsum; O: orthoclase; Ms: muscovite; An: anorthite.

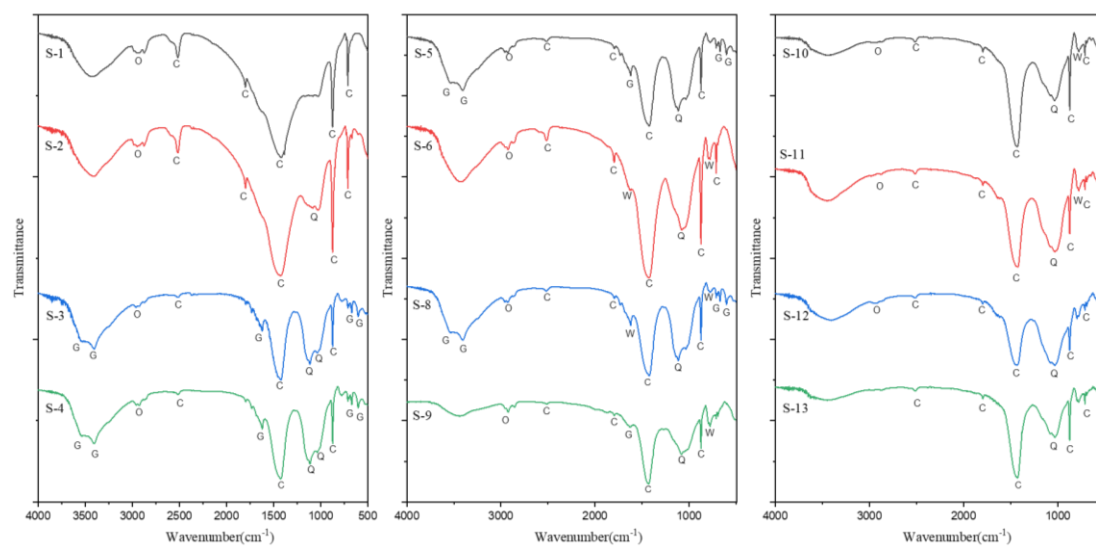

**Figure S5.** FTIR analysis of the construction materials; Q: quartz; C: calcite; G: gypsum; O: organic compounds; W: whewellite.

**Table S1.** Details of the historical constructions and surrounding environmental factors.

| Samp<br>le  | Heritage                                 | Comple<br>tion Date | Relative<br>humidity | Temperature /°C | Shading     |
|-------------|------------------------------------------|---------------------|----------------------|-----------------|-------------|
| <b>S-1</b>  | East of Li Da's former residence         | 1952                | 75.0±6.4%            | 23.1±2.1        | 84.82±4.34% |
| <b>S-2</b>  | North of Li Da's former residence        | 1952                | 79.1±3.8%            | 21.9±0.5        | 90.10±1.86% |
| <b>S-3</b>  | Eighteen villa complexes-3 <sup>#</sup>  | 1931                | 80.7±2.4%            | 22.1±0.8        | 97.59±1.27% |
| <b>S-4</b>  | East of the Wuhan University Archives    | 1936                | 74.0±1.5%            | 24.0±2.6        | 86.28±5.80% |
| <b>S-5</b>  | North of the Wuhan University Archives   | 1936                | 66.3±2.5%            | 24.8±3.0        | 90.16±5.43% |
| <b>S-6</b>  | Former residence of Weng Shouqian        | 1895                | 60.7±0.7%            | 25.0±0.4        | 64.59±2.41% |
| <b>S-7</b>  | Church of Canossian Sisters of Charity   | 1888                | 62.3±1.5%            | 24.9±0.9        | 76.79±6.63% |
| <b>S-8</b>  | Eighteen villa complexes-10 <sup>#</sup> | 1931                | 64.6±6.1%            | 27.4±2.7        | 89.94±4.29% |
| <b>S-9</b>  | Mapping Field Observatory                | 1956                | 66.3±1.1%            | 26.8±1.0        | 95.46±0.15% |
| <b>S-10</b> | West of Administration Building          | 1936                | 70.6±3.7%            | 23.9±1.3        | 91.97±2.19% |
| <b>S-11</b> | North of Administration Building         | 1936                | 62.8±2.0%            | 24.3±2.9        | 86.99±2.85% |
| <b>S-12</b> | East of the old library                  | 1935                | 60.0±1.8%            | 26.1±1.1        | 75.28±1.99% |
| <b>S-13</b> | West of the old library                  | 1935                | 55.3±5.9%            | 29.6±4.0        | 66.01±3.01% |

**Table S2.** Primer sets used in this study for bacteria, fungi, cyanobacteria, moss, and eukaryotic photoautotroph.

| <b>Population</b>                    | <b>Primers</b> | <b>Sequence (5'-3')</b>         |
|--------------------------------------|----------------|---------------------------------|
| <b>Bacteria</b>                      | EUB 338        | ACTCCTACGGGAGGCAGCAG            |
|                                      | EUB 518        | ATTACCGCGGCTGCTGG               |
| <b>Fungi</b>                         | NL1f           | ATTCCCAAACAACCTCGACTC           |
|                                      | LS2r           | ATTCCCAAACAACCTCGACTC           |
| <b>Cyanobacteria</b>                 | CYA 359F       | 5'-GGGGAATYTTCCGCAATGGG-3'      |
|                                      | CYA 781A       | 5'-GACTACTGGGGTATCTAATCCCATT-3' |
|                                      | CYA 781B       | 5'-ACTACAGGGGTATCTAATCCCTTT-3'  |
| <b>Moss</b>                          | rps5'          | 5'-ATGTCCCGTTATCGAGGACCT-3'     |
|                                      | trnS           | 5'- TACCGAGGGTTCTGAATC-3'       |
| <b>Eukaryotic<br/>photoautotroph</b> | p23SrV-F       | 5'-GGACAGAAAGACCCTATGAA-3'      |
|                                      | p23SrV-R       | 5'-TCAGCCTGTTATCCCTAGAG-3'      |
